# Supplementary material
Source: Royal Society of Chemistry journal article supplement (doi:10.1039/d6sd00062b)
Supplement: d6sd00062b1.xlsx [file d6sd00062b1.xlsx]

## Sheet: QC strips
Quality control comparison of two representative batches
	Running buffer	0.5% BSA and 0.5% Tween-20 in 1x PBS
	Sample volume	30 µL of running buffer spiked with recombinant leptin per strip
	Particles volume	1 µL of carboxylate-modified Europium (III) chelate polystyrene particles at 0.125% solids suspended in 1% BSA in PBS 1x per strip
	Batch	Sample	TL/CL ratio by Portable reader (Cube reader, Chembio)			Mean	Std dev	CV
	Batch 1	Blank	0.006	0.005	0.005	0.00533333	0.00057735	10.8253
		Positive	0.599	0.563	0.536	0.566	0.031607	5.58427
	Batch 2	Blank	0.003	0.003	0.007	0.00433333	0.0023094	53.2939
		Positive	0.517	0.504	0.562	0.527667	0.0304357	5.76798
	Inter-batch CV (calculated from positives)					6.36372

## Sheet: Fig. 2
Serial curve on buffer
	Running buffer	0.5% BSA and 0.5% Tween-20 in 1x PBS
	Sample volume	30 µL of running buffer spiked with recombinant leptin per strip
	Particles volume	1 µL of carboxylate-modified Europium (III) chelate polystyrene particles at 0.125% solids suspended in 1% BSA in PBS 1x per strip
	Leptin ng/mL	TL/CL intensity by Benchtop reader (LTRIC-600, Lumigenex )			Mean	Std dev	CV (%)		Leptin ng/mL	TL/CL intensity by Portable reader (Cube reader, Chembio)			Mean	Std dev	CV (%)
	0	0	0.009612	0	0.003204	0.00554949	173.205		0	0.006	0.004	0	0.00333333	0.00305505	91.6515
	0.25	0.026909	0.030062	0.032275	0.0297487	0.00269669	9.0649		0.25	0.018	0.019	0.02	0.019	0.001	5.26316
	0.5	0.04352	0.042426	0.047379	0.0444417	0.00260195	5.85476		0.5	0.023	0.026	0.028	0.0256667	0.00251661	9.80498
	1	0.082418	0.081462	0.091827	0.0852357	0.00572824	6.72047		1	0.065	0.073	0.079	0.0723333	0.00702377	9.71028
	2.5	0.211734	0.219424	0.2231	0.218086	0.00579993	2.65947		2.5	0.194	0.202	0.196	0.197333	0.00416333	2.1098
	5	0.458993	0.384097	0.409512	0.417534	0.038087	9.12188		5	0.409	0.309	0.359	0.359	0.05	13.9276
	10	0.602597	0.613637	0.667889	0.628041	0.0349481	5.56462		10	0.584	0.61	0.621	0.605	0.019	3.1405
	25	0.978653	1.13957	0.936297	1.01817	0.107242	10.5328		25	0.943	1.188	0.961	1.03067	0.136552	13.2489
	50	1.1882	1.2568	1.28329	1.24276	0.0490716	3.94859		50	1.224	1.228	1.235	1.229	0.00556776	0.453032
	100	1.6697	1.58662	1.55229	1.60287	0.0603687	3.76629		100	1.756	1.687	1.619	1.68733	0.0685006	4.0597
	µblank + 3.3σ		0.0215173						µblank + 3.3σ		0.013415

## Sheet: Fig. 3
Serial curve on calf serum 50%
	Sample volume			30 µL of calf serum at 50% in running buffer spiked with recombinant leptin
	Particles volume			1 µL of carboxylate-modified Europium (III) chelate polystyrene particles at 0.125% solids suspended in 1% BSA in PBS 1x per strip
	Running buffer (final composition in the sample)			0.25% BSA, 0.5% Tween-20 and 0.5% PEG 3350
	Leptin ng/mL	TL/CL ratio by Benchtop reader (LTRIC-600, Lumigenex )			Mean	Std dev	CV		Leptin ng/mL	TL/CL ratio by Portable reader (Cube reader, Chembio)			Mean	Std dev	CV
	0	0.00389961	0	0	0.00129987	0.00225144	173.205		0	0.002	0.001	0.002	0.00166667	0.00057735	34.641
	0.25	0.0226346	0.0233684	0.0243947	0.0234659	0.0008841	3.76759		0.25	0.019	0.016	0.017	0.0173333	0.00152753	8.81265
	0.5	0.05055	0.053634	0.060159	0.054781	0.00490611	8.95586		0.5	0.035	0.031	0.038	0.0346667	0.00351188	10.1304
	1	0.11099	0.115656	0.122076	0.116241	0.00556608	4.78841		1	0.079	0.084	0.087	0.0833333	0.00404145	4.84974
	2.5	0.363454	0.415142	0.323026	0.367207	0.0461726	12.574		2.5	0.339	0.359	0.271	0.323	0.0461303	14.2818
	5	0.668583	0.637949	0.674255	0.660262	0.0195309	2.95805		5	0.667	0.625	0.737	0.676333	0.0565803	8.36575
	10	1.07816	1.08356	1.17405	1.11192	0.0538691	4.84468		10	1.107	1.174	1.172	1.151	0.0381182	3.31175
	25	1.48274	1.69437	1.79247	1.65653	0.158293	9.55575		25	1.509	1.69	1.831	1.67667	0.161414	9.62705
	50	1.74892	1.82935	1.95031	1.84286	0.101375	5.50095		50	1.773	1.754	1.887	1.80467	0.0719328	3.98593
	100	2.51759	2.08742	2.58198	2.39566	0.26888	11.2236		100	2.547	2.62	2.098	2.42167	0.28267	11.6725
	µblank + 3.3σ		0.00872962						µblank + 3.3σ		0.00357192

## Sheet: Fig. 4
Serial curve of human serum sample U7
	Sample volume			30 µL of human serum diluted in running buffer at varying concentrations
	Particles volume			1 µL of carboxylate-modified Europium (III) chelate polystyrene particles at 0.125% solids suspended in 1% BSA in PBS 1x per strip
	Running buffer (final composition in the sample)			0.25% BSA, 0.5% Tween-20 and 0.5% PEG 3350
	Serum (%)	TL/CL ratio by Benchtop reader (LTRIC-600, Lumigenex )			Mean	Std dev	CV		Serum (%)	TL/CL ratio by Portable reader (Cube reader, Chembio)			Mean	Std dev	CV
	0	0	0	0.0121347	0.00404491	0.00700599	173.205		0	0	0	0.003	0.001	0.00173205	173.205
	3.125	0	0	0	0	0	NA		3.125	0.011	0.01	0.009	0.01	0.001	10
	6.25	0.026699	0.0064547	0.0168153	0.0166564	0.0101231	60.7762		6.25	0.035	0.023	0.022	0.0266667	0.00723418	27.1282
	12.5	0.0947993	0.0940745	0.0902163	0.09303	0.00246355	2.64812		12.5	0.081	0.09	0.085	0.0853333	0.00450925	5.28428
	25	0.167451	0.156161	0.158381	0.160664	0.00598142	3.72293		25	0.149	0.141	0.156	0.148667	0.00750555	5.04858
	50	0.281576	0.312513	0.238737	0.277609	0.0370475	13.3452		50	0.275	0.272	0.229	0.258667	0.0257358	9.94942

## Sheet: Fig. 5
LFA vs ELISA comparison
		Sample volume			30 µL of human serum diluted at 25% in running buffer
		Particles volume			1 µL of carboxylate-modified Europium (III) chelate polystyrene particles at 0.125% solids suspended in 1% BSA in PBS 1x per strip
		Running buffer (final composition in the sample)			0.25% BSA, 0.5% Tween-20 and 0.5% PEG 3350
	Leptin concentration calculated from ELISA (ng/mL)		TL/CL ratio by Benchtop reader (LTRIC-600, Lumigenex )			Mean	Std dev	CV (%)	TL/CL ratio by Portable reader (Cube reader, Chembio)			Mean	Std dev	CV (%)
	U1	6.682	1.08829	1.15315	1.05802	1.09982	0.0486004	4.41894	1.116	1.186	1.106	1.136	0.043589	3.83706
	U2	12.575	1.55537	1.50634	1.61563	1.55911	0.0547388	3.51089	1.675	1.669	1.705	1.683	0.0192873	1.14601
	U3	4.776	0.577912	0.607725	0.630324	0.605321	0.0262886	4.34291	0.499	0.48	0.455	0.478	0.0220681	4.61675
	U4	1.514	1.58727	1.35621	1.41564	1.45304	0.119985	8.25749	1.667	1.423	1.517	1.53567	0.123066	8.01387
	U5	8.293	1.64095	1.7852	1.77517	1.73377	0.0805422	4.64549	1.87	1.843	1.766	1.82633	0.053966	2.95488
	U6	0.703	2.12668	2.0787	2.19474	2.13337	0.0583093	2.73319	2.242	2.168	2.336	2.24867	0.0841982	3.74436
	U7	0.208	0.119831	0.125778	0.105693	0.117101	0.0103171	8.81048	0.116	0.129	0.121	0.122	0.00655744	5.37495
	U8	2.016	0.679108	0.576194	0.637621	0.630974	0.0517778	8.20601	0.656	0.574	0.586	0.605333	0.0442869	7.31612
	U9	3.12	1.48786	1.29965	1.48862	1.42537	0.108885	7.63904	1.641	1.466	1.568	1.55833	0.0878996	5.64061
	U10	1.67	1.23854	1.31072	1.2782	1.27582	0.036151	2.83355	1.334	1.463	1.399	1.39867	0.0645006	4.61158
	F1	4.099	0.738483	0.688869	0.671375	0.699576	0.0348115	4.97608	0.735	0.814	0.694	0.747667	0.0609945	8.15799
	F2	5.49	0.737348	0.705468	0.624	0.688939	0.058454	8.48464	0.746	0.707	0.667	0.706667	0.0395011	5.58977
	F3	1.773	0.693028	0.741138	0.636966	0.690377	0.0521368	7.55193	0.686	0.694	0.749	0.709667	0.0342977	4.83293
	F4	5.81	0.448496	0.434701	0.512338	0.465178	0.04142	8.90412	0.465	0.502	0.558	0.508333	0.0468224	9.21096
	F5	10.588	0.664647	0.597351	0.709034	0.657011	0.0562313	8.55866	0.746	0.704	0.799	0.749667	0.047606	6.35029
	F6	10.32	0.704187	0.687955	0.637491	0.676545	0.0347817	5.14107	0.713	0.694	0.696	0.701	0.0104403	1.48934
	F7	0.676	0.709617	0.63521	0.739475	0.694767	0.053695	7.72848	0.794	0.692	0.662	0.716	0.0691954	9.66416
	F8	1.61	2.49844	2.73146	2.49343	2.57445	0.136005	5.28288	2.719	2.985	2.66	2.788	0.173139	6.21014
	F9	6.718	0.226694	0.261345	0.256359	0.248133	0.018733	7.5496	0.182	0.214	0.2	0.198667	0.0160416	8.07464
	F10	6.029	1.20101	1.0914	1.27613	1.18952	0.0929017	7.81004	1.329	1.235	1.429	1.331	0.0970155	7.28892
	M1	3.04	1.36415	1.43736	1.48602	1.42918	0.0613455	4.29236	1.455	1.418	1.592	1.48833	0.0916642	6.15885
	M2	2.476	1.9075	1.86457	1.86419	1.87875	0.0248994	1.32532	2.018	1.94	2.015	1.991	0.0441928	2.21963
	M3	2.148	1.26768	1.22269	1.30376	1.26471	0.0406165	3.21153	1.406	1.566	1.508	1.49333	0.0810021	5.42424
	M4	1.823	0.396357	0.429146	0.421042	0.415515	0.0170788	4.11028	0.405	0.421	0.424	0.416667	0.0102144	2.45145
	M5	2.362	1.8166	1.77851	1.68591	1.76034	0.0672099	3.81801	2.017	1.902	1.876	1.93167	0.0750355	3.8845
	M6	1.604	0.336879	0.382068	0.377847	0.365598	0.024961	6.82745	0.378	0.347	0.355	0.36	0.0160935	4.47041
	M7	2.409	0.203511	0.218049	0.224027	0.215196	0.0105515	4.90319	0.197	0.191	0.193	0.193667	0.00305505	1.57748
	M8	15.621	0.577912	0.607725	0.630324	0.605321	0.0262886	4.34291	0.55	0.584	0.6	0.578	0.0255343	4.4177
	M9	0.84	0.999208	1.05001	1.01545	1.02156	0.0259441	2.53966	1.038	1.072	0.992	1.034	0.0401497	3.88295
	M10	3.869	0.501615	0.468039	0.487199	0.485618	0.0168437	3.46851	0.62	0.582	0.581	0.594333	0.0222336	3.74093

## Sheet: Fig. S1
Orientation of the detection and capture antibodies
	Running buffer	0.5% BSA, 0.25% Tween 20, 0.3% PEG 3350 in 1x PBS
	Sample volume	30 µL of sample in running buffer per strip
	Particles volume	1 µL of carboxylate-modified Europium (III) chelate polystyrene particles suspension in 1% BSA in PBS 1x per strip
	TL/CL ratio by Benchtop reader (LTRIC-600, Lumigenex )
	Recombinant leptin (ng/mL)	Strips with non biotinylated antibodies (MAB398)	Strips with biotinylated antibodies (BAM398)
		Particles with biotinylated antibodies (BAM398)	Particles with non biotinylated antibodies
	0	0	0.018358
	0.5	0	0.106385
	5	0.82974	0.675715
	50	1.33421	1.69568

## Sheet: Fig. S2
Buffer screening for buffer experiments
	Sample volume	30 µL of sample per strip
	Particles volume	1 µL of carboxylate-modified Europium (III) chelate polystyrene particles suspension in 1% BSA in PBS 1x per strip
	Buffer composition
		Buffer A	Buffer B	Buffer C	Buffer D
	Bovine serum albumin (%)	0.5	0.5	1	1
	Tween-20 (%)	0.5	0.5	0.5	0.5
	PEG 3350 (%)	0	0.5	0	0.5
	TL/CL ratio by Benchtop reader (LTRIC-600, Lumigenex )
	Blank	0	0	0	0
		0	0	0	0
		0	0	0	0.00187505
	5 ng/mL	0.334921	0.210621	0.144211	0.15503
		0.39919	0.205755	0.158173	0.140318
		0.385626	0.223695	0.163032	0.140053

## Sheet: Fig. S3
Buffer screening for serum experiments
	Sample volume	30 µL of sample per strip
	Particles volume	1 µL of carboxylate-modified Europium (III) chelate polystyrene particles suspension in 1% BSA in PBS 1x per strip
	Buffer composition
		Buffer E	Buffer F	Buffer G	Buffer H
	Bovine serum albumin (%)	0.5	0.25	0.25	0
	Tween-20 (%)	0.5	0.5	0.5	0.5
	PEG 3350 (%)	0	0.5	0	0.5
			Buffer E	Buffer F	Buffer G	Buffer H		Buffer E	Buffer F	Buffer G	Buffer H
		TL/CL ratio by Benchtop reader (LTRIC-600, Lumigenex )					TL/CL ratio by Portable reader (Cube reader, Chembio)
		Blank	0	0.01225	0	0.00311166	Blank	0.009	0.01	0.01	0.008
			0	0.0106264	0	0.00502223		0.009	0.009	0.012	0.012
			0.00818407	0	0.00306013	0		0.008	0.011	0.008	0.009
		5 ng/mL	0.363068	0.375467	0.323518	0.250377	5 ng/mL	0.457	0.495	0.352	0.343
			0.399634	0.448934	0.35218	0.292356		0.452	0.493	0.403	0.365
			0.344625	0.379977	0.339333	0.29154		0.448	0.483	0.376	0.261

## Sheet: Fig. S4
Leptin in human serum by Human Leptin Quantikine QuicKit ELISA (QK398, R&D Systems)
		Leptin levels (ng/mL)			Mean	Std dev	CV (%)			Mean	Standard deviation	Median
	U1	26.53	26.54	27.11	26.7267	0.332014	1.24226		Unknown	16.6223	15.8375	10.2717
	U2	46.76	53.07	51.07	50.3	3.2247	6.41094		Female	21.2446	13.6548	22.6
	U3	18.9	19.22	19.19	19.1033	0.17673	0.925124		Male	14.4764	17.1768	9.54081
	U4	5.76	6.05	6.36	6.05667	0.300056	4.95414
	U5	32.1	34.58	32.84	33.1733	1.27316	3.8379
	U6	2.74	2.81	2.88	2.81	0.07	2.4911
	U7	0.79	0.87	0.83	0.83	0.04	4.81928
	U8	7.98	8.04	8.17	8.06333	0.0971253	1.20453
	U9	12.47	12.32	12.65	12.48	0.165227	1.32394
	U10	6.37	6.69	6.98	6.68	0.305123	4.56771
		Leptin levels (ng/mL)			Mean	Std dev	CV (%)
	F1	16.431	16.2432	16.5147	16.3963	0.139045	0.848028
	F2	21.3455	21.4497	23.088	21.9611	0.977361	4.45042
	F3	6.85004	7.08344	7.34041	7.0913	0.245282	3.45892
	F4	22.7486	23.7041	23.2643	23.239	0.478262	2.05801
	F5	41.6788	41.8475	43.5327	42.353	1.02511	2.42041
	F6	39.5872	40.456	43.7911	41.2781	2.21923	5.37628
	F7	2.64744	2.68765	2.77765	2.70425	0.0666738	2.46552
	F8	6.30623	6.73944	6.26895	6.4382	0.261542	4.06234
	F9	25.9678	27.9802	26.6633	26.8704	1.02204	3.80359
	F10	23.5557	23.502	25.2848	24.1142	1.01414	4.20558
		Leptin levels (ng/mL)			Mean	Std dev	CV (%)
	M1	11.9128	12.0835	12.4862	12.1608	0.294457	2.42135
	M2	9.67068	9.97209	10.0723	9.90503	0.209046	2.11051
	M3	8.49537	8.58964	8.69451	8.59317	0.0996165	1.15925
	M4	7.0474	7.11945	7.70548	7.29078	0.360943	4.95068
	M5	9.21631	9.38936	9.73423	9.44663	0.263668	2.79113
	M6	6.28377	6.71723	6.24646	6.41582	0.261694	4.07889
	M7	9.33882	9.91929	9.64683	9.63498	0.290419	3.01422
	M8	60.1477	65.4053	61.8935	62.4822	2.67775	4.28562
	M9	3.08955	3.2831	3.70399	3.35888	0.314151	9.35283
	M10	14.6436	16.4411	15.3438	15.4762	0.906075	5.85465
