# Supplementary material
Source: Royal Society of Chemistry journal article supplement (doi:10.1039/d6sd00062b)

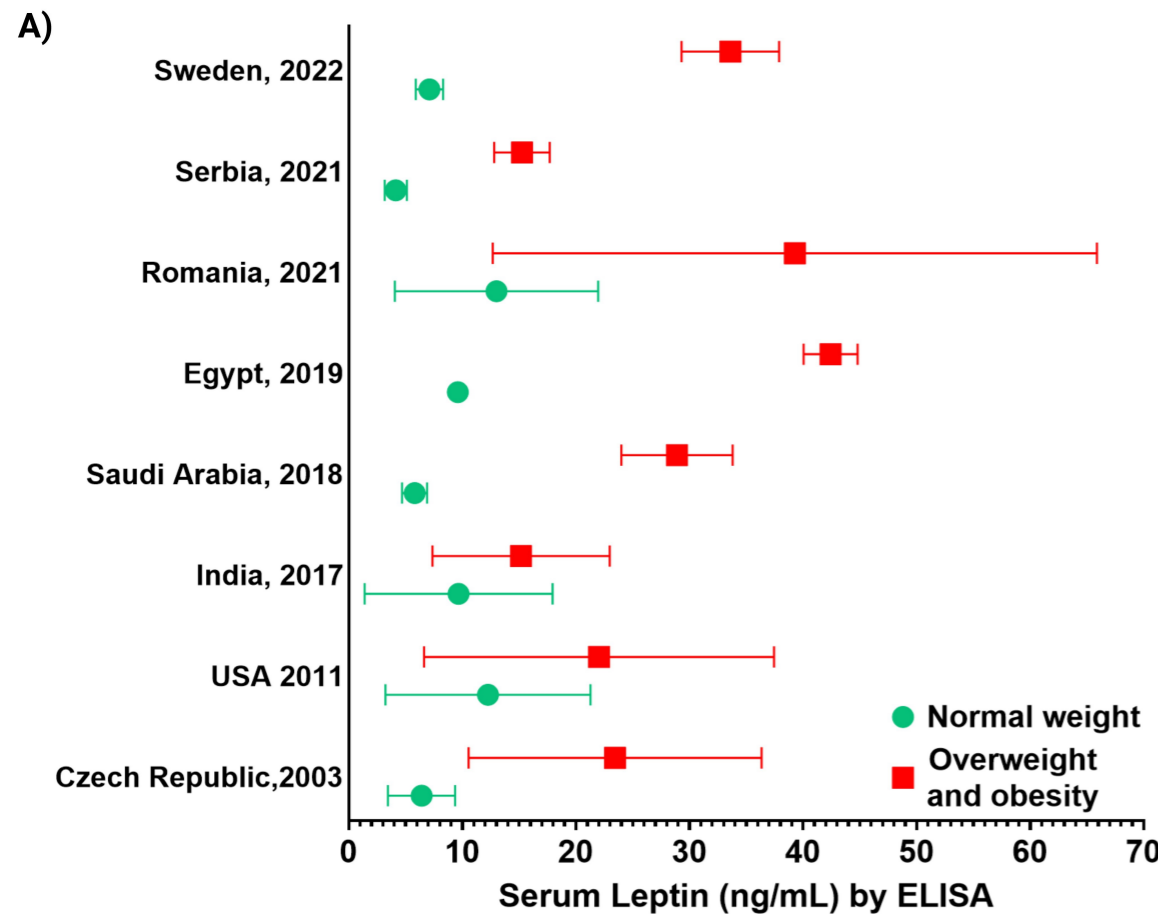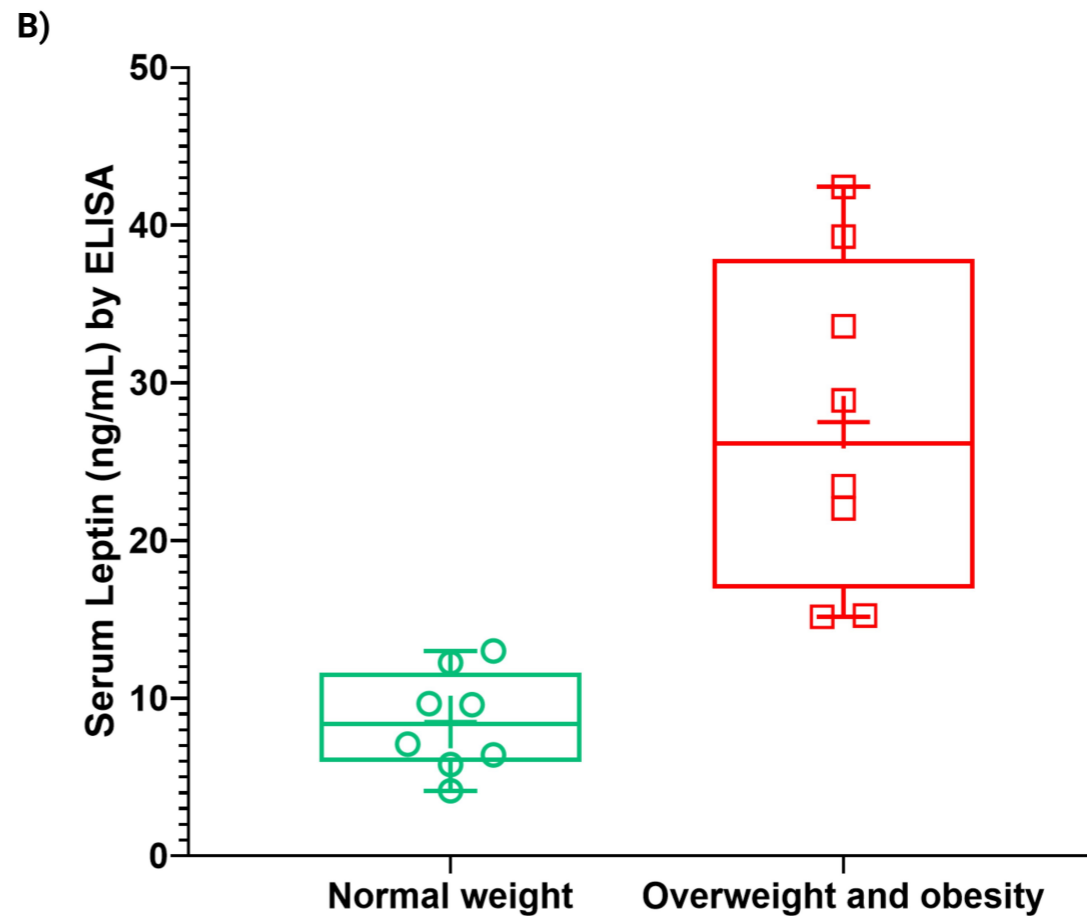

Supplement: d6sd00062b1.pdf [file d6sd00062b1.pdf]

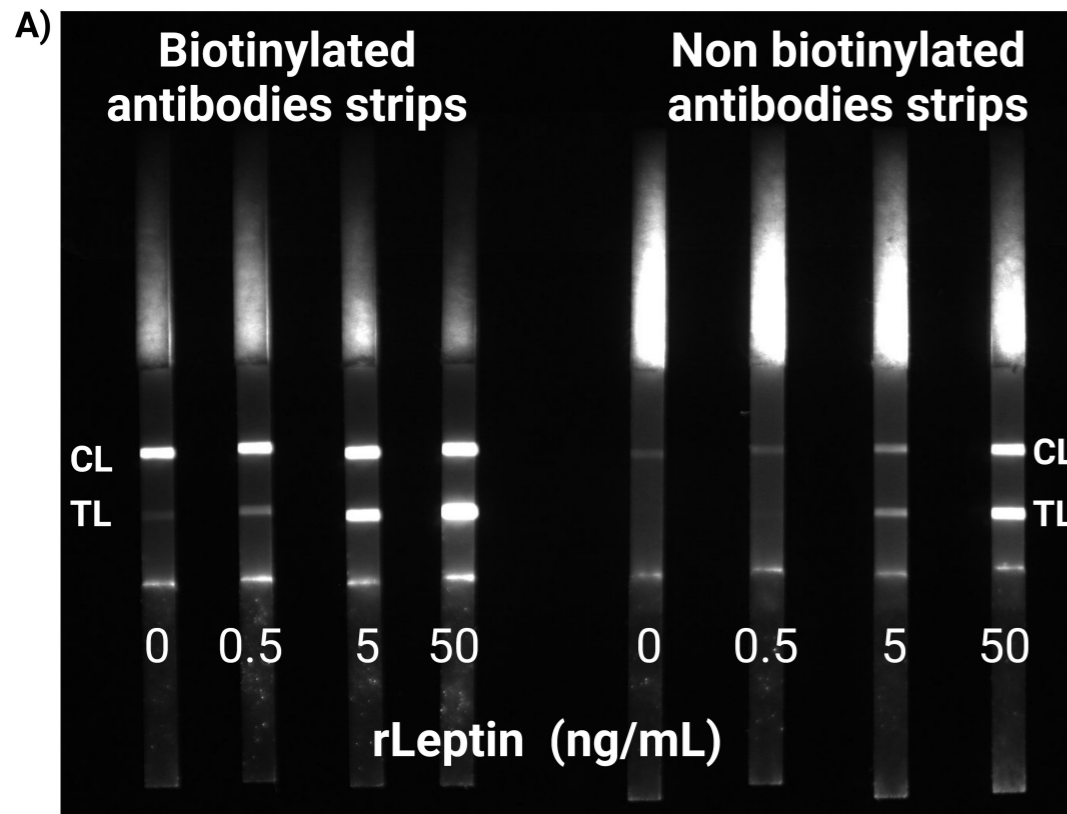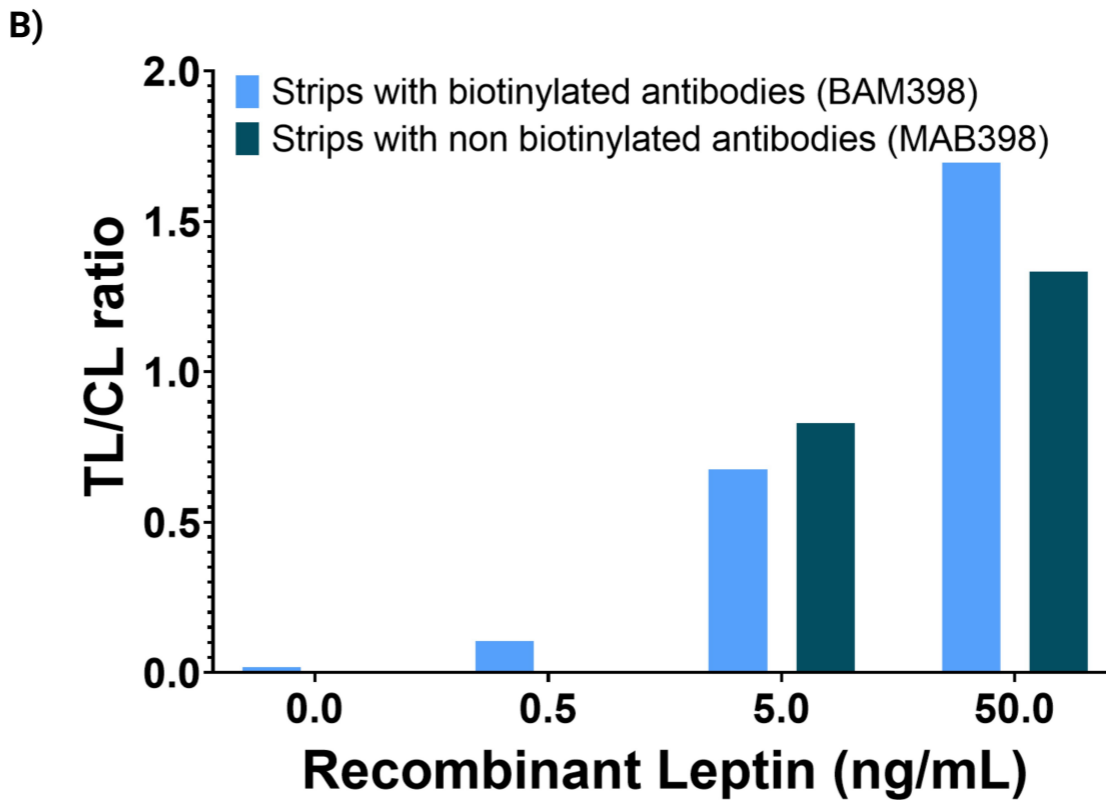

Supplement: d6sd00062b2.pdf [file d6sd00062b2.pdf]

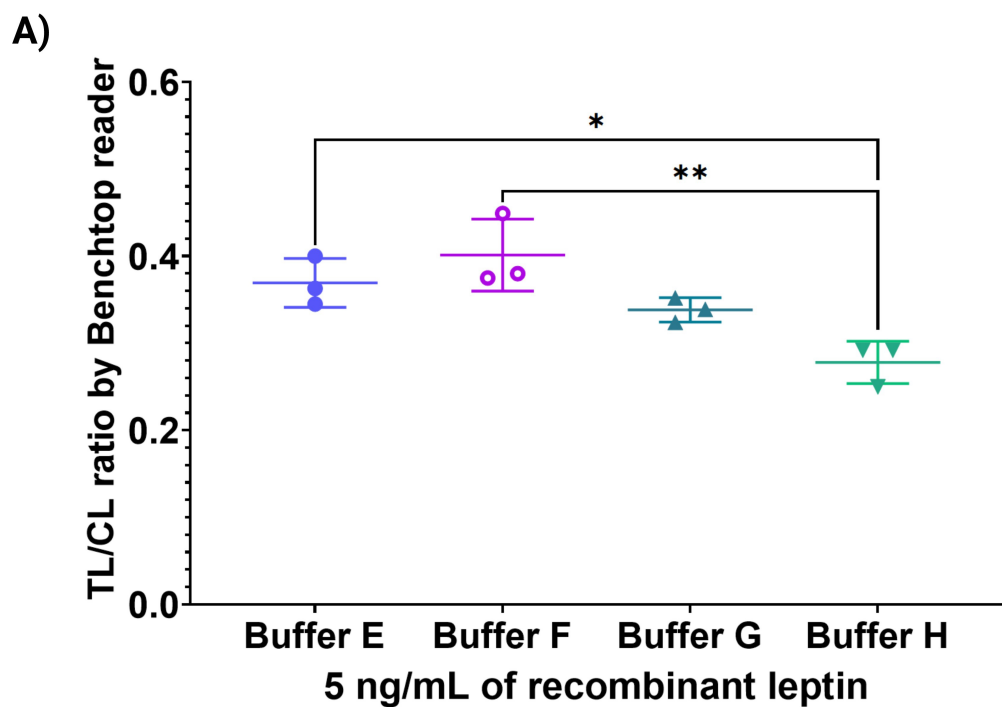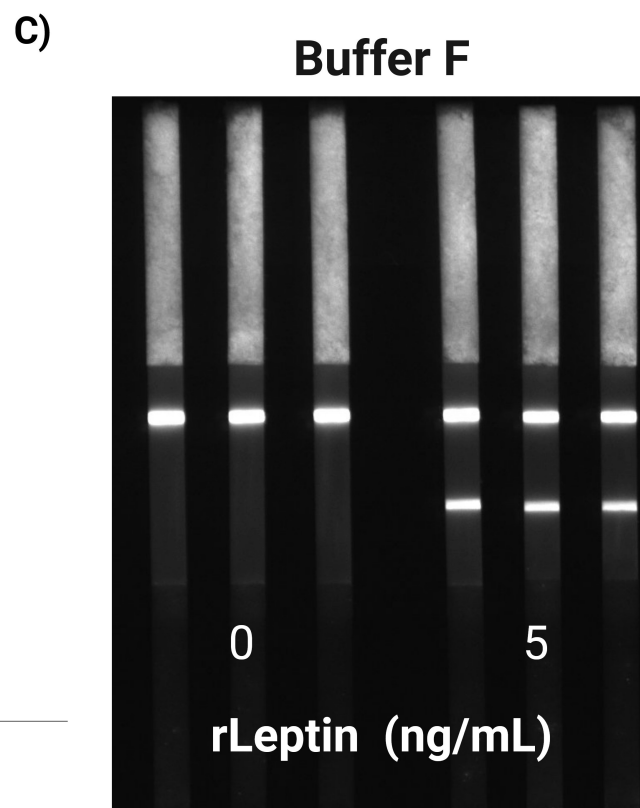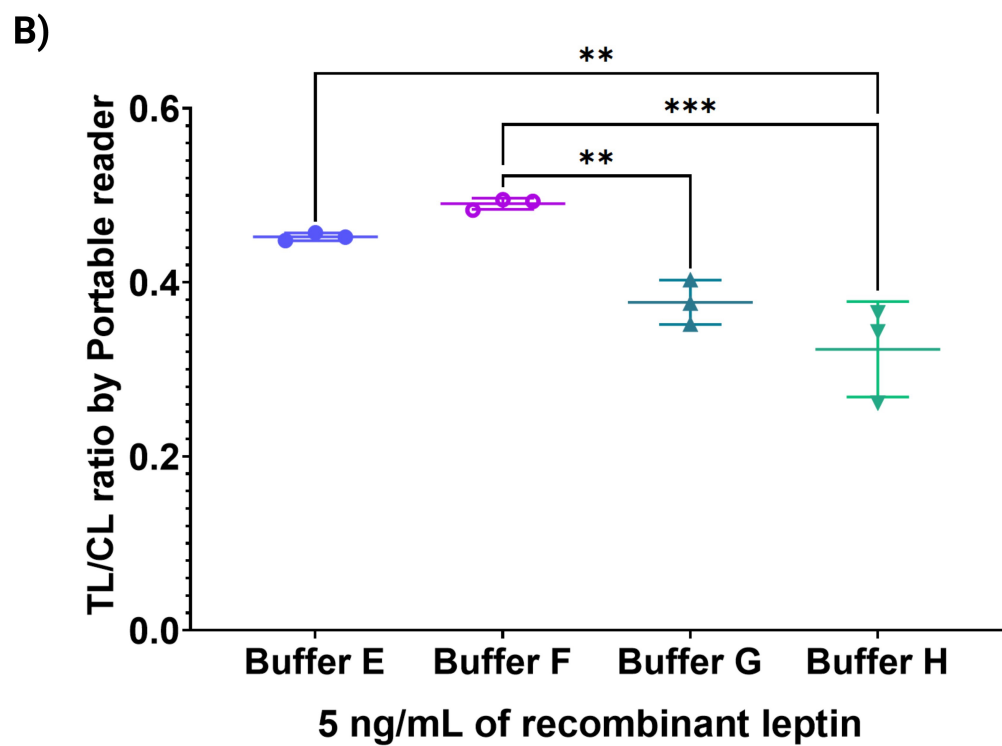

Supplement: d6sd00062b4.pdf [file d6sd00062b4.pdf]

A)

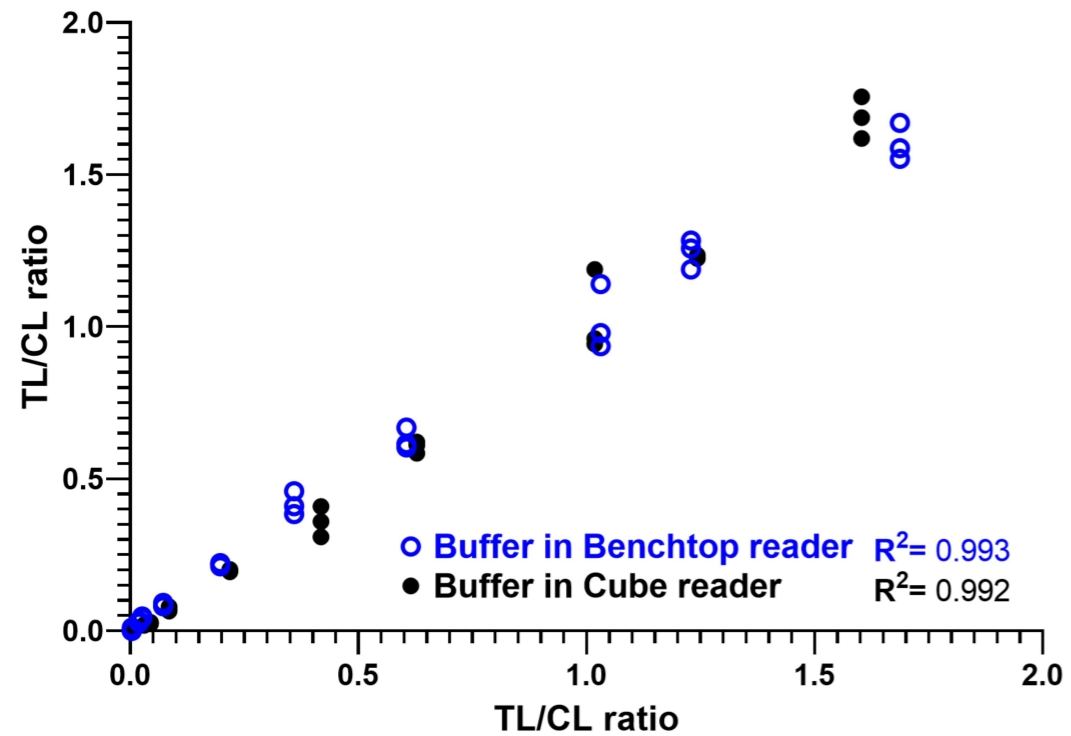

B)

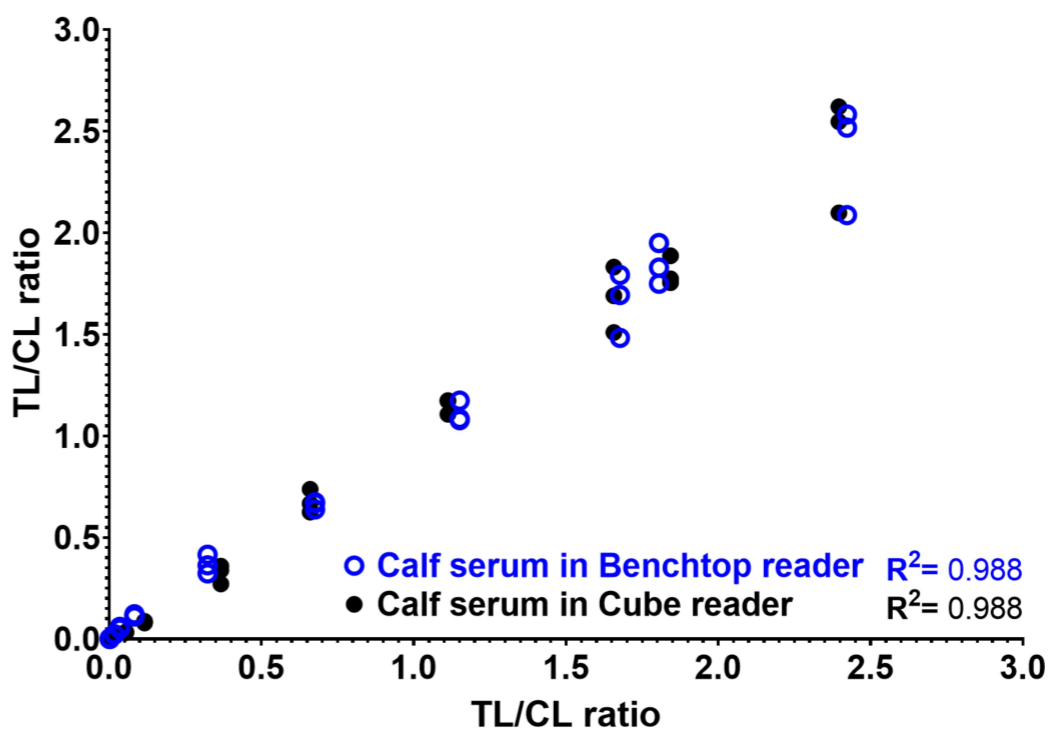

Supplement: d6sd00062b5.pdf [file d6sd00062b5.pdf]

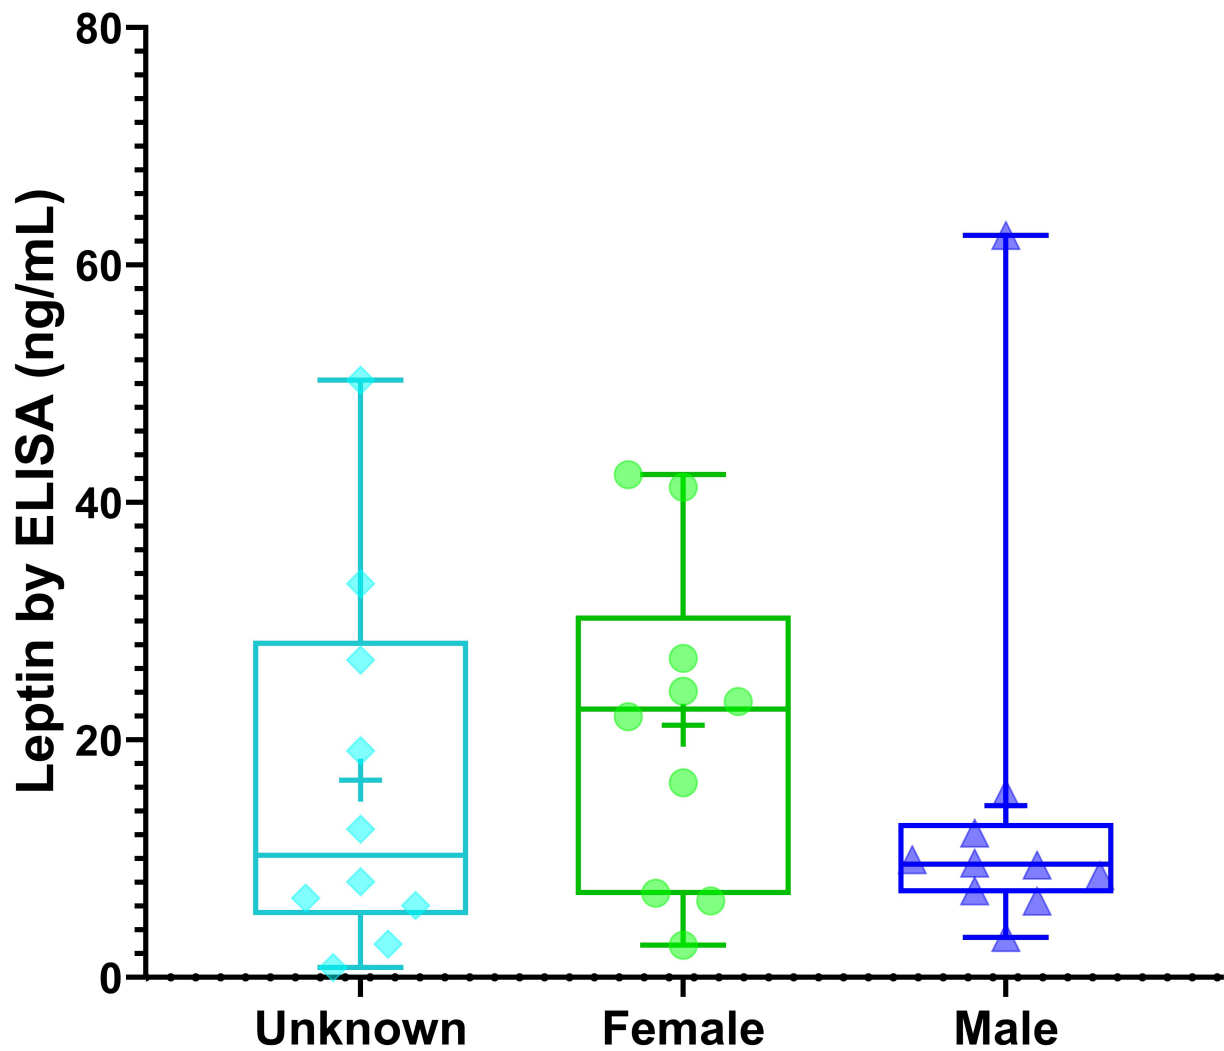

Supplement: d6sd00062b6.pdf [file d6sd00062b6.pdf]

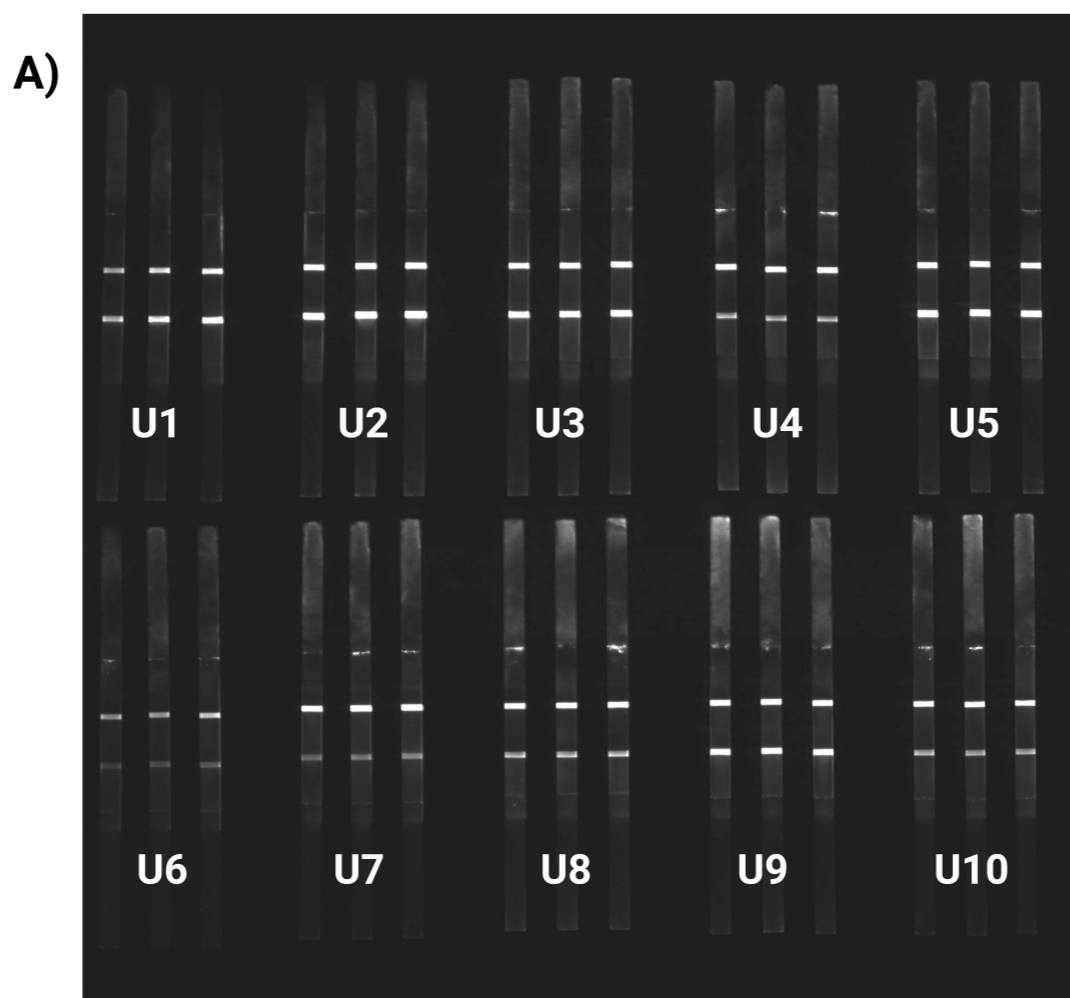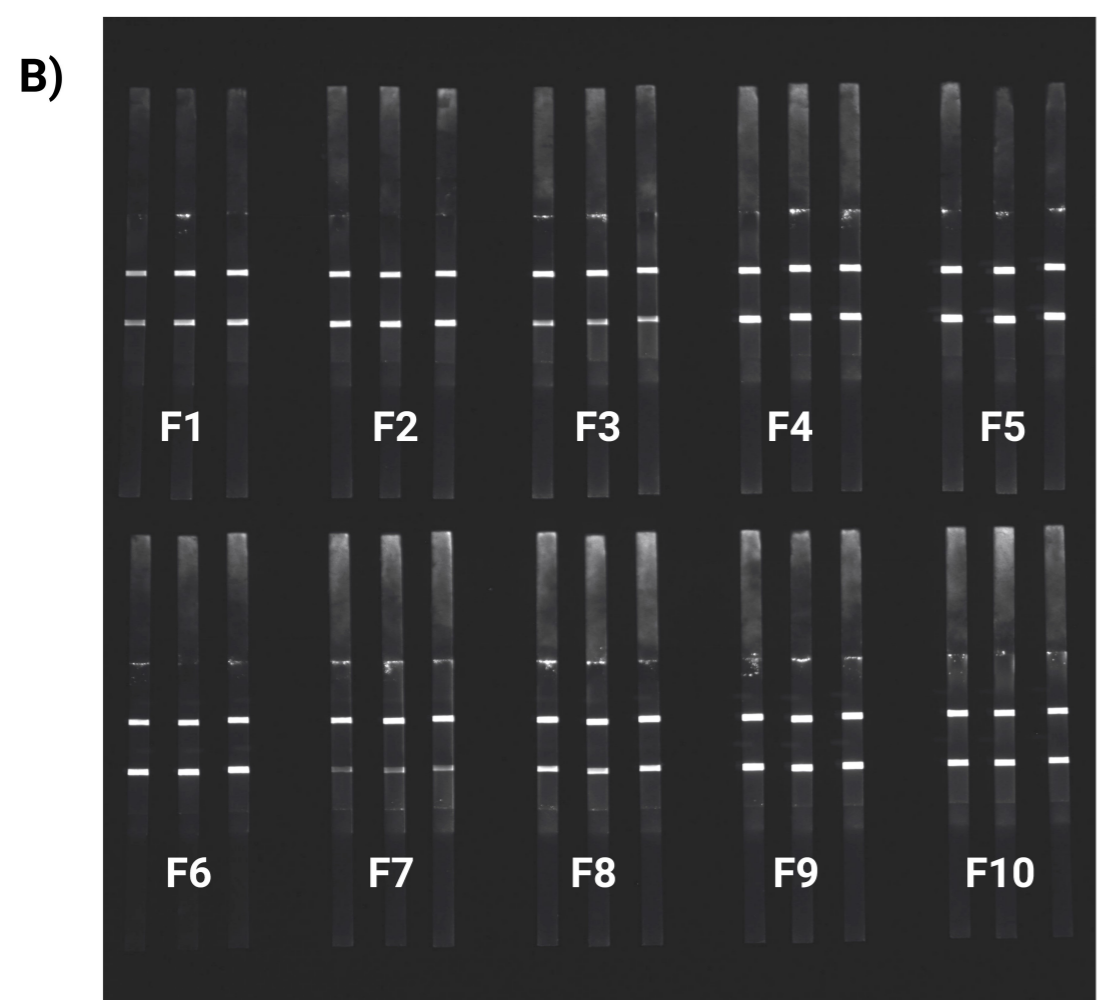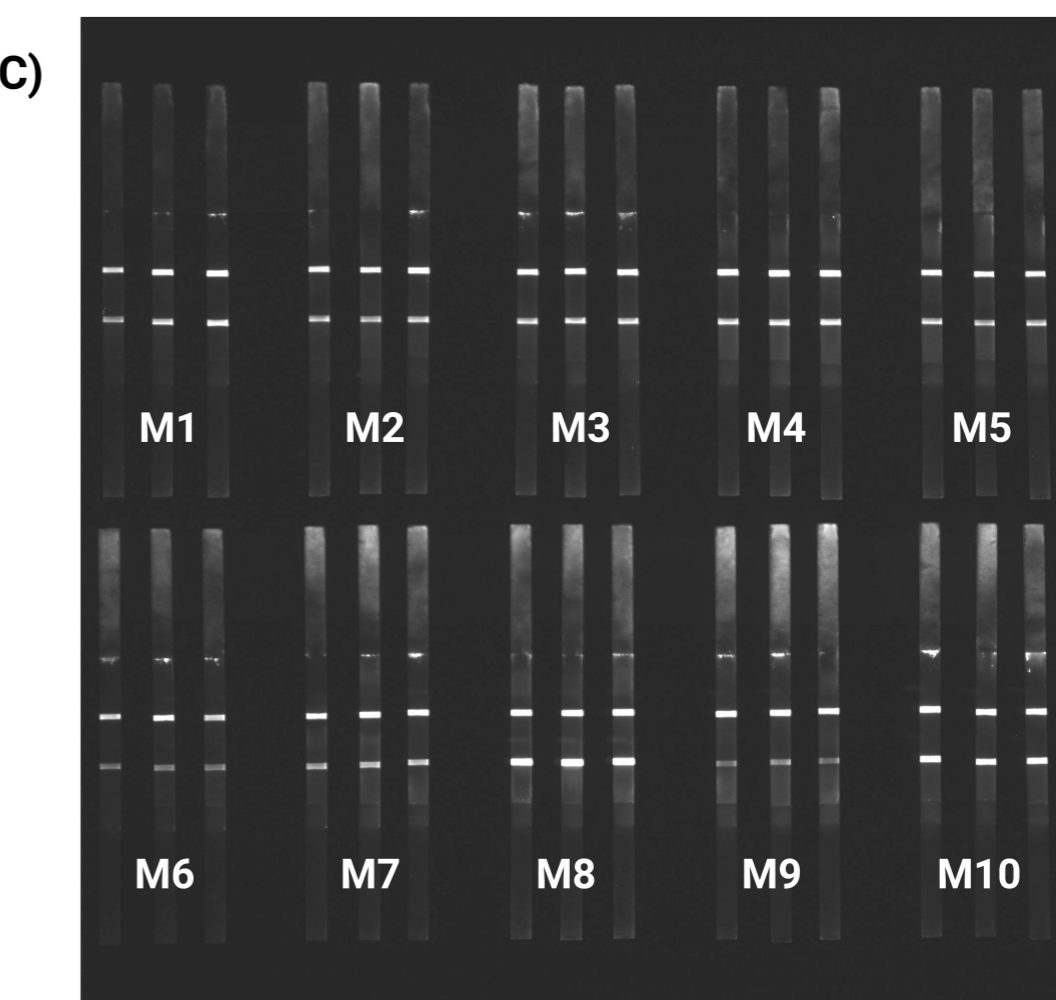

Supplement: d6sd00062b7.pdf [file d6sd00062b7.pdf]
